# Supplementary material
Source: publisher site journal article supplement (https://www.kjim.org/upload/media/kjim-2020-222-suppl1.pdf)
Supplement: Supplementary file 1 [file kjim-2020-222-suppl1.pdf]

## Supplementary material 1. The questionnaire of the survey

### A. English version

#### A survey on the opinion of Korean infectious diseases specialists regarding COVID-19

The Korean Society of Infectious Diseases wishes to collect information on the opinions of infection experts on controversial issues related to the current COVID-19 pandemic. The data collected will be used to propose policies related to COVID-19 at the academic level, in response to the press, and promote them to the public. The survey is anonymous and without monetary reward. Its completion takes about 5 minutes, and the participation of personnel other than infectious diseases specialists (excluding fellows in training) is limited.

#### o. Agreement to participate in the survey

Would you agree to participate in this survey (a survey on the opinion of Korean infectious diseases specialists regarding COVID-19)?

- ☐ Yes ☐ No

#### 1. Information about responder and affiliated hospital

- 1-1. Sex ☐ Male ☐ Female
- 1-2. Age (\_\_\_\_\_ years old)
- 1-3. Year of the acquisition of the infectious diseases board? (\_\_\_\_\_)
- 1-4. Please indicate your position (choose one)
- ☐ Director of the clinical department ☐ Director of Infection Control
- ☐ Other (\_\_\_\_\_) ☐ Not applicable
- 1-5. What type of medical institution do you work for?
- ☐ Tertiary-care hospital ☐ Secondary-care hospital ☐ Hospital
- ☐ Clinic
- 1-6. Which of the following is the medical institution where you work?
- ☐ National university-affiliated hospital ☐ Private university-affiliated hospital
- ☐ Public Hospital; Not university-affiliated ☐ Private hospital; Not university-affiliated
- ☐ Other (\_\_\_\_\_)
- 1-7. Please select the size of the medical institution you work for.
- ☐ Less than 300 beds ☐ 300-600 beds ☐ 600-900 beds
- ☐ 900-1200 beds ☐ 1200 beds or more
- 1-8. Does the hospital where you work run a state-designated negative-pressure isolation unit?
- ☐ Yes ☐ No
- 1-9. Where do you work?
- ☐ Seoul ☐ Incheon ☐ Gyeonggi-do ☐ Busan
- ☐ Daegu ☐ Ulsan ☐ Gyeongsangnam-do
- ☐ Gyeongsangbuk-do ☐ Daejeon/Sejong ☐ Chungcheongnam-do
- ☐ Chungcheongbuk-do ☐ Gwangju ☐ Jeollanam-do
- ☐ Jeollabuk-do ☐ Gangwon-do ☐ Jeju-do
- 1-10. How many infectious diseases specialists are there in the hospital where you work? (\_\_\_\_\_)
- 1-11. How many COVID-19 confirmed patients have you treated so far as an attending physician? (including patients who have been dispatched to a living and treatment support center or other institution)
- ☐ Less than 10 ☐ 10-30 ☐ 30-50 ☐ 50-100
- ☐ 100-200 ☐ 200-300 ☐ 300+ ☐ Not applicable

## 2. Opinions on COVID-19-related issues

### <Prospects of COVID-19 outbreak>

2-1. When do you expect the current domestic COVID-19 epidemic to end?

- ☐ May 2020                      ☐ June 2020                      ☐ July-August 2020  
☐ September-October 2020                      ☐ November-December 2020                      ☐ After December 2020

2-2. When do you expect the current global COVID-19 pandemic to end?

- ☐ May 2020                      ☐ June 2020                      ☐ July-August 2020  
☐ September-October 2020                      ☐ November-December 2020                      ☐ After December 2020

2-3. Do you expect a nationwide second wave to occur in Korea?

- ☐ Very unlikely                      ☐ unlikely                      ☐ Some likelihood                      ☐ likely                      ☐ Very likely

2-4. When do you expect a nationwide second wave to occur in the country?

- ☐ May 2020                      ☐ June 2020                      ☐ July-August 2020  
☐ September-October 2020                      ☐ November-December 2020                      ☐ After December 2020  
☐ Answered the previous question as unlikely or very unlikely

2-5. How long do you think we should maintain our strategy to prevent inflow into hospitals (COVID-19 screening clinics, safe clinics for respiratory patients, pre-emptive isolation for pneumonia, etc.)?

- ☐ May 2020                      ☐ June 2020                      ☐ July-August 2020  
☐ September-October 2020                      ☐ November-December 2020                      ☐ After December 2020

2-6. How much more social distancing do you think is needed to prevent COVID-19 transmission?

- ☐ No longer needed                      ☐ Within two weeks from now  
☐ Within three to four weeks from now                      ☐ Within 5-6 weeks from now  
☐ Within 7-8 weeks from now                      ☐ More than 8 weeks from now

### <Preparation for future COVID-19 outbreak>

2-7. In the event of a second wave, please select 3 items that you believe will be lacking in medical institutions and that will need to be prepared in advance.

- ☐ Hooded coveralls                      ☐ N95 respirators/masks                      ☐ PAPR equipment (including hoods)  
☐ Other protective gear (goggles, hair caps, etc.)                      ☐ Hand sanitizer  
☐ Isolation units (including negative-pressure units)  
☐ Equipment for oxygen supplementation (including ventilators, high-flow O<sub>2</sub>)  
☐ Professional physicians for COVID-19  
☐ Professional nursing personnel for COVID-19                      ☐ Diagnostic equipment  
☐ Infection control personnel                      ☐ Drugs for treatment (chloroquine, remdesivir, etc.)

2-7-1. Please describe any items not included above that you think will be necessary. (\_\_\_\_\_)

2-8. Do you think it is necessary or possible to reuse N95 masks within a medical institution in the case of a shortage?

- ☐ I think reuse is necessary and possible  
☐ I think reuse is necessary but I don't think it's possible  
☐ Reuse is not necessary, but I think it is possible  
☐ Reuse is not necessary and is not possible  
☐ Not sure

2-9. If a shortage of ventilators occurs, what criteria should be used to prioritize patients?

- ☐ Severity of the disease                      ☐ Probability of recovery  
☐ Life expectancy                      ☐ Social role (e.g. leaders, professionals, etc.)  
☐ Hospital arrival order                      ☐ Tax payment degree  
☐ Not sure

2-10. Taking into account the domestic situation, what area of research and development do you believe needs to be fostered in preparation for further spreading of COVID-19? Please select 3 items.

- ☐ Development of an effective epidemiological investigation system
- ☐ Development of an effective self-isolation monitoring tool
- ☐ Development of an effective protective gear
- ☐ Development of rapid and accurate diagnostic testing methods
- ☐ Development of an effective drug for treatment
- ☐ Development of an effective vaccine
- ☐ Development of mass supply methods for convalescent plasma from cured patients
- ☐ Establishing animal experimental models that can verify reported therapeutic agents or new drugs
- ☐ Establishing a clinical trial system that can verify reported therapeutic agents or new drugs
- ☐ Establishing a system for virus segregation

2-10-1. Please describe any items not included above that you think are necessary. (\_\_\_\_\_)

2-11. Choose 3 policies that you believe should be implemented at the national level to prevent/prepare for another COVID-19 outbreak in the future.

- ☐ Securing living and treatment support centers
- ☐ Securing national hospitals designated for the treatment of infectious disease
- ☐ Strengthening immigration or prohibiting entry from countries in the outbreak
- ☐ Maintaining social distancing
- ☐ Securing masks and hand sanitizer
- ☐ Reorganizing healthcare-related government
- ☐ Activation of online education/conference systems
- ☐ Full-fledged introduction of telemedicine
- ☐ Establishing a system for participation of private medical institutions/medical personnel in outbreaks

2-11-1. Please describe any items not included above that you think are necessary. (\_\_\_\_\_)

2-12. Which of the following profiles do you believe will require screening with RT-PCR tests to prevent COVID-19 outbreaks in medical institution in cases where an individual does not have any symptoms? Please select all items which you think necessary.

- ☐ Patients with a history of visiting affected or at-risk areas
- ☐ All patients who require hospitalization
- ☐ All patients who need surgery
- ☐ All patients who have recently been admitted to other hospitals
- ☐ Medical staff treating patients with COVID-19
- ☐ Screening for asymptomatic individuals is not required
- ☐ Other (\_\_\_\_\_)

2-13. After the end of the current pandemic, what measures do you believe should be upheld to prevent another outbreak? Please select 3 items.

- ☐ Maintaining a 2 meter distance from others
- ☐ Wearing masks in public places
- ☐ Avoiding public spaces if symptoms of infection develop, such as fever
- ☐ Thorough hand hygiene
- ☐ Use of personal items, such as towels, tableware, mobile phones, etc.
- ☐ Observing cough etiquette
- ☐ Informing hospitals of recent trips to at-risk areas or contact with infected patients before a hospital visit

2-13-1. Please describe any items not included above that you think are necessary. (\_\_\_\_\_)

2-14. What type of mask do you recommend should be worn by the public in daily life, including when visiting

public places?

- |                                             |                                          |                                        |
|---------------------------------------------|------------------------------------------|----------------------------------------|
| <input type="checkbox"/> KF94 (or N95) mask | <input type="checkbox"/> KF80 mask       | <input type="checkbox"/> Surgical mask |
| <input type="checkbox"/> Face mask          | <input type="checkbox"/> Not recommended |                                        |

#### <Treatment for COVID-19>

2-15. Choose 3 drugs you believe will be the most effective in treating COVID-19 patients.

- |                                                                         |                                                                          |
|-------------------------------------------------------------------------|--------------------------------------------------------------------------|
| <input type="checkbox"/> Hydroxychloroquine or chloroquine              | <input type="checkbox"/> Macrolides (including azithromycin)             |
| <input type="checkbox"/> Anti-HIV drugs (including lopinavir/ritonavir) | <input type="checkbox"/> Remdesivir                                      |
| <input type="checkbox"/> Oseltamivir                                    | <input type="checkbox"/> Interferon                                      |
| <input type="checkbox"/> Convalescent plasma                            | <input type="checkbox"/> Systemic corticosteroid                         |
| <input type="checkbox"/> Inhaled corticosteroid (including ciclesonide) | <input type="checkbox"/> IL-6 pathway inhibitors (including tocilizumab) |

2-15-1. Please describe any items not included above that you think are necessary. (\_\_\_\_\_)

2-16. Would you recommend administering hydroxychloroquine or chloroquine to asymptomatic patients under the age of 60 who have no underlying diseases?

- ☐ Yes ☐ No

2-17. Would you recommend administering hydroxychloroquine or chloroquine to patients with moderate symptoms without pneumonia under 60 years of age without underlying disease, SpO<sub>2</sub> >95%?

- ☐ Yes ☐ No

2-18. Would you recommend administering hydroxychloroquine or chloroquine to patients with moderate symptoms with underlying diseases or no pneumonia over 60 years of age, SpO<sub>2</sub> >95%?

- ☐ Yes ☐ No

2-19. Would you recommend administering hydroxychloroquine or chloroquine to patients with pneumonia, SpO<sub>2</sub> >95%?

- ☐ Yes ☐ No

2-20. Would you recommend administering hydroxychloroquine or chloroquine to patients with pneumonia requiring oxygen therapy?

- ☐ Yes ☐ No

2-21. Would you recommend administering hydroxychloroquine or chloroquine to prevent of COVID-19 in elderly patients with underlying diseases after exposure in the hospital?

- ☐ Yes ☐ No

2-22. Would you recommend administering hydroxychloroquine or chloroquine to prevent COVID-19 in medical staffs treating COVID-19 patients?

- ☐ Yes ☐ No

2-23. If administering hydroxychloroquine or chloroquine, what do you believe the duration of the regimen should be to be effective in treating patients?

- |                                        |                                     |                                                                       |                                     |
|----------------------------------------|-------------------------------------|-----------------------------------------------------------------------|-------------------------------------|
| <input type="checkbox"/> Within 5 days | <input type="checkbox"/> 5-7 days   | <input type="checkbox"/> 8-10 days                                    | <input type="checkbox"/> 11-14 days |
| <input type="checkbox"/> 15-21 days    | <input type="checkbox"/> 22-28 days | <input type="checkbox"/> Until negative conversion of virus detection |                                     |

#### <Miscellaneous>

2-24. Which of the following COVID-19 issues do you think requires urgent attention? Please select 3 items.

- ☐ Determining the actual efficacy of existing or new drugs in the treatment of COVID-19
- ☐ Accuracy of existing diagnostic testing methods, including RT-PCR testing
- ☐ The possibility of re-infection or the reactivation of the virus after patient recovery
- ☐ Effectiveness of preventive medication in the prevention of infection
- ☐ Selection criteria for individuals to be examined and tested

- Efficacy of protective gear in preventing infection
  - The isolation criteria (e.g. inspection before release from isolation)
  - The conditions underlying the infection transmission (e.g. period of infection propagation)
- 2-24-1. Please describe any items not included above that you think are necessary. (\_\_\_\_\_)

**B. Korean version****COVID-19에 대한 국내 감염 전문가 견해 조사**

대한감염학회에서는 많은 논란이 되고 있는 COVID-19 관련 이슈에 대한 감염 전문가들의 의견을 취합하고자 합니다. 취합된 자료는 향후 학회 차원의 COVID-19 관련 정책 제언, 언론 대응, 대국민 홍보 등에 활용할 예정입니다. 본 설문조사는 개인식별정보를 익명화하여 보호하고 생명윤리 및 안전에 관한 법률에 따라 설문조사자료는 보관 및 폐기될 예정입니다. 설문조사에 따른 금전적 보상은 없으며 약 10분이 소요될 것으로 예상되며 감염내과 분과전문의(수련 중인 fellow 제외) 이외 인력의 참여는 제한됩니다.

**0. 설문조사 참여 동의**

0-1. 본 설문 조사(COVID-19에 대한 국내 감염 전문가 견해 조사)에 참여하는 것에 동의하십니까?

☐ 예 ☐ 아니오

**1. 설문조사 응답 인력 기본 정보**

1-1. 성별 ☐ 남성 ☐ 여성

1-2. 연령 (만 \_\_\_\_\_ 세)

1-3. 감염내과 분과 전문의 취득 년도는 언제입니까? ( \_\_\_\_\_ 년)

1-4. 선생님의 직위에 해당하는 항목을 표시해 주십시오(복수 응답)

☐ 진료과장 ☐ 감염관리부서장 ☐ 병원내 기타 보직자(\_\_\_\_\_)

☐ 해당사항 없음

1-5. 선생님이 근무하시는 의료기관의 유형은 무엇입니까?

☐ 상급종합병원 ☐ 종합병원 ☐ 병원 ☐ 의원

1-6. 선생님이 근무하시는 의료기관은 아래 중 어디에 해당하십니까?

☐ 국공립 대학병원 ☐ 사립 대학병원 ☐ 공공병원-비대학병원

☐ 민간병원-비대학병원 ☐ 기타(\_\_\_\_\_)

1-7. 선생님이 근무하시는 의료기관의 규모를 선택해 주십시오

☐ 300병상 미만 ☐ 300-600병상 ☐ 600-900병상

☐ 900-1200병상 ☐ 1200병상 이상

1-8. 선생님이 근무하는 병원은 국가지정 음압치료병상을 운영하고 있습니까?

☐ 예 ☐ 아니오

1-9. 선생님의 근무 지역은 어디입니까?

☐ 서울 ☐ 인천 ☐ 경기도

☐ 부산 ☐ 대구 ☐ 울산

☐ 경상남도 ☐ 경상북도 ☐ 대전/세종

☐ 충청남도 ☐ 충청북도 ☐ 광주

☐ 전라남도 ☐ 전라북도 ☐ 강원도

☐ 제주도

1-10. 선생님이 근무하는 병원에는 감염내과 분과 전문의가 총 몇 명입니까? (\_\_\_\_\_명)

1-11. 선생님께서 지금까지 주치의나 담당의로 진료한 COVID-19 확진 환자의 수는 몇 명입니까? (생활치료센터나 타 기관에 파견되어 진료한 환자를 포함합니다)

☐ 10명 미만 ☐ 10-30명 ☐ 30-50명 ☐ 50-100명

☐ 100-200명 ☐ 200-300명 ☐ 300명 이상

## 2. COVID-19 관련 이슈에 대한 의견

### <COVID-19 유행 전망>

2-1. 현재의 국내 COVID-19 유행이 언제쯤 종식 될 것으로 예상하시는지요?

- |                                       |                                         |                                       |
|---------------------------------------|-----------------------------------------|---------------------------------------|
| <input type="checkbox"/> 2020년 5월중    | <input type="checkbox"/> 2020년 6월중      | <input type="checkbox"/> 2020년 7-8월중  |
| <input type="checkbox"/> 2020년 9-10월중 | <input type="checkbox"/> 2020년 11월-12월중 | <input type="checkbox"/> 2020년 12월 이후 |

2-2. 현재의 세계 COVID-19 대유행이 언제쯤 종식 될 것으로 예상하시는지요?

- |                                       |                                         |                                       |
|---------------------------------------|-----------------------------------------|---------------------------------------|
| <input type="checkbox"/> 2020년 5월중    | <input type="checkbox"/> 2020년 6월중      | <input type="checkbox"/> 2020년 7-8월중  |
| <input type="checkbox"/> 2020년 9-10월중 | <input type="checkbox"/> 2020년 11월-12월중 | <input type="checkbox"/> 2020년 12월 이후 |

2-3. 전국적 규모의 대유행(second wave)이 국내에 발생할 것으로 예상하시는지요?

- |                                     |                                     |                                        |
|-------------------------------------|-------------------------------------|----------------------------------------|
| <input type="checkbox"/> 가능성이 매우 낮음 | <input type="checkbox"/> 가능성이 낮음    | <input type="checkbox"/> 가능성이 어느 정도 있음 |
| <input type="checkbox"/> 가능성이 높음    | <input type="checkbox"/> 가능성이 매우 높음 |                                        |

2-4. 전국적 규모의 대유행(second wave)이 언제 국내에 발생할 것으로 예상하시는지요?

- |                                       |                                         |                                       |
|---------------------------------------|-----------------------------------------|---------------------------------------|
| <input type="checkbox"/> 2020년 5월중    | <input type="checkbox"/> 2020년 6월중      | <input type="checkbox"/> 2020년 7-8월중  |
| <input type="checkbox"/> 2020년 9-10월중 | <input type="checkbox"/> 2020년 11월-12월중 | <input type="checkbox"/> 2020년 12월 이후 |

☐ 가능성이 매우 낮거나 매우 낮다고 생각함

2-5. 병원내 유입 방지를 위한 전략(선별진료소, 안심진료소, 폐렴 선제격리 등)을 언제까지 유지해야 한다고 생각하시는지요?

- |                                       |                                         |                                       |
|---------------------------------------|-----------------------------------------|---------------------------------------|
| <input type="checkbox"/> 2020년 5월중    | <input type="checkbox"/> 2020년 6월중      | <input type="checkbox"/> 2020년 7-8월중  |
| <input type="checkbox"/> 2020년 9-10월중 | <input type="checkbox"/> 2020년 11월-12월중 | <input type="checkbox"/> 2020년 12월 이후 |

2-6. COVID-19 전파 방지를 위해서 앞으로 얼마나 더 사회적 거리두기가 필요하다고 생각하시는지요?

- |                                       |                                       |                                       |
|---------------------------------------|---------------------------------------|---------------------------------------|
| <input type="checkbox"/> 더 이상 필요치 않음  | <input type="checkbox"/> 지금부터 2주 이내   | <input type="checkbox"/> 지금부터 3-4주 이내 |
| <input type="checkbox"/> 지금부터 5-6주 이내 | <input type="checkbox"/> 지금부터 7-8주 이내 | <input type="checkbox"/> 지금부터 8주 이상   |

### <COVID-19 2차 유행 대비>

2-7. 향후 2차 유행이 발생할 경우 의료기관 내에서 부족이 예상되어 미리 준비가 필요하다고 생각하시는 항목 1, 2, 3순위를 골라 주십시오.

- |                                         |                                                                    |                                  |
|-----------------------------------------|--------------------------------------------------------------------|----------------------------------|
| <input type="checkbox"/> 전신보호복          | <input type="checkbox"/> N95 (혹은 그에 준하는) respirator/mask           |                                  |
| <input type="checkbox"/> PAPR 장비(후드 포함) | <input type="checkbox"/> 기타 보호 장구(고글, 헤어캡 등)                       | <input type="checkbox"/> 손소독제    |
| <input type="checkbox"/> 격리병상(음압병상 포함)  | <input type="checkbox"/> 산소 공급 장치(인공호흡기, high-flow O2 포함)          |                                  |
| <input type="checkbox"/> 전문 의사 인력       | <input type="checkbox"/> 전문 간호 인력                                  | <input type="checkbox"/> 진단검사 장비 |
| <input type="checkbox"/> 감염 관리 인력       | <input type="checkbox"/> 치료에 시도되고 있는 약제(chloroquine, remdesivir 등) |                                  |

2-7-1. 위의 문항에 포함되지 않은 항목 중 반드시 필요하다고 생각하시는 것이 있다면 자유롭게 기술하여 주십시오.

( )

2-8. N95 마스크가 부족할 경우 의료기관 내에서 재사용이 필요 혹은 가능하다고 생각하십니까?

- |                                               |                                                 |
|-----------------------------------------------|-------------------------------------------------|
| <input type="checkbox"/> 재사용이 필요하고 가능하다고 생각   | <input type="checkbox"/> 재사용이 필요하나 가능하지 않다고 생각  |
| <input type="checkbox"/> 재사용이 필요 없으나 가능하다고 생각 | <input type="checkbox"/> 재사용이 필요 없고 가능하지 않다고 생각 |
| <input type="checkbox"/> 잘 모르겠음               |                                                 |

2-9. 만약 ventilator 부족 사태가 발생할 경우 어떤 기준에 따라 환자의 우선 순위를 정해야 한다고 생각하십니까?

- |                                                  |                                   |                                   |
|--------------------------------------------------|-----------------------------------|-----------------------------------|
| <input type="checkbox"/> 질환의 중증도                 | <input type="checkbox"/> 회복 가능성   | <input type="checkbox"/> 기대 여명    |
| <input type="checkbox"/> 사회적 역할(e.g. 지도자, 전문직 등) | <input type="checkbox"/> 병원 도착 순서 | <input type="checkbox"/> 세금 납부 정도 |
| <input type="checkbox"/> 잘 모르겠음(답변이 어려움)         |                                   |                                   |

2-10. 국내 현황을 고려하였을 때 유행의 확산에 대비하기 위해 가장 중점적으로 육성해야 하는 연구 개발 정책 분야는 무엇이라고 생각하시는지요? 중요한 3가지를 골라 주십시오.

- |                                            |                                              |
|--------------------------------------------|----------------------------------------------|
| <input type="checkbox"/> 효과적인 역학 조사 시스템 개발 | <input type="checkbox"/> 효과적인 자가 격리 감시 도구 개발 |
| <input type="checkbox"/> 효과적인 보호구 개발       | <input type="checkbox"/> 신속하고 정확한 진단검사법 개발   |
| <input type="checkbox"/> 효과적인 치료약제 개발      | <input type="checkbox"/> 백신 개발               |

- ☐ 완치환자 혈장 제공 및 대량 공급방법 개발
- ☐ 보고되고 있는 치료물질이나 신약을 검증할 수 있는 동물실험모델 구축 및 활성화
- ☐ 보고되고 있는 치료물질이나 신약을 검증할 수 있는 임상시험체계 구축 및 활성화
- ☐ 바이러스 분리 배양을 위한 시스템 구축 및 활성화

2-10-1. 위의 문항에 포함되지 않은 항목 중 반드시 필요하다고 생각하시는 것이 있다면 자유롭게 기술하여 주십시오.

( )

2-11. 향후 2차 유행 발생을 방지/대비하기 위해 국가 차원에서 수행이 필요하다고 생각하는 정책 3가지를 골라 주십시오.

- |                                                           |                                             |
|-----------------------------------------------------------|---------------------------------------------|
| <input type="checkbox"/> 생활치료센터 확보                        | <input type="checkbox"/> 감염병 전담병원 확보        |
| <input type="checkbox"/> 위험지역국가에서의 입국심사 강화/입국금지           | <input type="checkbox"/> 사회적 거리두기 유지        |
| <input type="checkbox"/> 마스크, 손소독제 확보                     | <input type="checkbox"/> 보건의료 관련 정부조직 개편    |
| <input type="checkbox"/> 화상 교육, 화상 회의 시스템 활성화             | <input type="checkbox"/> 화상 진료 시스템의 본격적인 도입 |
| <input type="checkbox"/> 유행 상황에서 민간 의료기관/의료인 참여 관련 시스템 정립 |                                             |

2-11-1. 위의 문항에 포함되지 않은 항목 중 반드시 필요하다고 생각하시는 것이 있다면 자유롭게 기술하여 주십시오.

( )

2-12. 다음 중 의료기관 내 유행을 방지하기 위하여 발열이나 호흡기 증상이 없더라도 스크리닝이 필요하다고 생각하는 대상은 무엇입니까? (복수 응답)

- |                                                   |                                               |
|---------------------------------------------------|-----------------------------------------------|
| <input type="checkbox"/> 국내 혹은 해외 유행지역 방문력이 있는 환자 | <input type="checkbox"/> 입원이 필요한 모든 환자        |
| <input type="checkbox"/> 수술이 필요한 모든 환자            | <input type="checkbox"/> 최근 타병원 입원력이 있는 모든 환자 |
| <input type="checkbox"/> 확진 환자 진료에 투입되는 의료진       | <input type="checkbox"/> 상주 보호자(간병인 포함)       |
| <input type="checkbox"/> 증상이 없는 환자 스크리닝은 필요치 않음   |                                               |
| <input type="checkbox"/> 기타( )                    |                                               |

2-13. 현재의 유행이 종식되더라도 2차 유행 방지를 위해 필요하다고 생각하는 국민 생활 수칙은 무엇입니까? 중요한 3가지를 골라 주십시오.

- |                                                                     |                                         |
|---------------------------------------------------------------------|-----------------------------------------|
| <input type="checkbox"/> 일상에서 2m 거리 유지                              | <input type="checkbox"/> 공공 장소에서 마스크 착용 |
| <input type="checkbox"/> 발열 등 증상이 있을 경우 공공장소 방문 자제                  | <input type="checkbox"/> 철저한 손위생 준수     |
| <input type="checkbox"/> 수건, 식기류, 휴대전화 등 개인물품 사용                    | <input type="checkbox"/> 기침 예절 준수       |
| <input type="checkbox"/> 병의원 방문 시 진료 전 위험지역 방문력, 호흡기 질환자 접촉 여부를 알림. |                                         |

2-13-1. 위의 문항에 포함되지 않은 항목 중 반드시 필요하다고 생각하시는 것이 있다면 자유롭게 기술하여 주십시오.

( )

2-14. 공공장소 방문을 포함한 일상 생활에서 착용을 권고하는 마스크 종류는 무엇입니까?

- |                                            |                                          |                                  |
|--------------------------------------------|------------------------------------------|----------------------------------|
| <input type="checkbox"/> KF94 (혹은 N95) 마스크 | <input type="checkbox"/> KF80 마스크        | <input type="checkbox"/> 외과용 마스크 |
| <input type="checkbox"/> 면 마스크             | <input type="checkbox"/> 마스크 착용을 권고하지 않음 |                                  |

#### 〈COVID-19 치료제〉

2-15. 다음 약제들 중 COVID-19 환자 치료에 가장 효과적일 것으로 생각되는 약물 3가지를 골라주십시오.

- |                                                                  |                                                                   |
|------------------------------------------------------------------|-------------------------------------------------------------------|
| <input type="checkbox"/> Hydroxychloroquine or Chloroquine       | <input type="checkbox"/> Macrolides (azithromycin 포함)             |
| <input type="checkbox"/> Anti-HIV drugs (Lopinavir/ritonavir 포함) | <input type="checkbox"/> Remdesivir                               |
| <input type="checkbox"/> Oseltamivir                             | <input type="checkbox"/> Interferon                               |
| <input type="checkbox"/> 회복기 환자 혈장                               | <input type="checkbox"/> 전신 스테로이드                                 |
| <input type="checkbox"/> ciclesonide 등 흡입 스테로이드                  | <input type="checkbox"/> IL-6 pathway inhibitors (tocilizumab 포함) |

2-15-1. 위의 문항에 포함되지 않은 항목 중 치료에 효과적이라고 생각하시는 약물이 있다면 자유롭게 기술하여 주십시오.

( )

2-16. 기저질환이 없는 60세 이하 무증상-경증 환자에게 hydroxychloroquine or chloroquine을 투여하시겠습니까?

- ☐ 예 ☐ 아니오



2-17. 기저질환이 없는 60세 이하 폐렴이 없는 중등도 증상 환자( $SpO_2 > 95\%$ )에게 hydroxychloroquine or chloroquine을 투여하시겠습니까?

☐ 예 ☐ 아니오

2-18. 기저질환이 있거나 60세 이상 폐렴이 없는 중등도 증상 환자( $SpO_2 > 95\%$ )에게 hydroxychloroquine or chloroquine을 투여하시겠습니까?

☐ 예 ☐ 아니오

2-19. 폐렴이 있는 환자( $SpO_2 > 95\%$ )에게 hydroxychloroquine or chloroquine을 투여하시겠습니까?

☐ 예 ☐ 아니오

2-20. 산소치료를 요하는 폐렴이 있는 환자에게 hydroxychloroquine or chloroquine을 투여하시겠습니까?

☐ 예 ☐ 아니오

2-21. 원내 노출 후 고령 및 기저질환자에 대한 예방 목적으로 hydroxychloroquine or chloroquine을 투여하시겠습니까?

☐ 예 ☐ 아니오

2-22. COVID-19 확진환자를 진료하는 의료진에 대한 예방 목적으로 hydroxychloroquine or chloroquine을 투여하시겠습니까?

☐ 예 ☐ 아니오

2-23. Hydroxychloroquine or chloroquine regimen을 사용한다면 어느 정도 기간 동안 투약하는 것이 환자 치료에 효과적이라고 생각하십니까?

☐ 5일 이내 ☐ 5-7일 ☐ 8-10일 ☐ 11-14일  
☐ 15-21일 ☐ 22-28일 ☐ 바이러스 음전 시점까지

#### <기타>

2-24. 다음 중 현재 국내 의료현장에서 시급한 정립 혹은 재정립이 필요할 것으로 생각하시는 COVID-19 이슈는 무엇입니까? 중요한 3가지를 골라주십시오.

- ☐ 치료에 효과가 있을 수 있는 기존 약제나 신약들의 실제 효능
- ☐ PCR검사를 포함한 현존하는 진단 검사법의 정확성
- ☐ 완치 판정 후 바이러스 재감염 혹은 재활성화 가능성
- ☐ 감염 예방을 위한 예방적 약물 요법의 효능/효과
- ☐ 검사 대상의 선정 기준
- ☐ 감염 전파 예방을 위한 보호구 착용의 범위
- ☐ 격리 해제 기준(격리 해제를 위해 수행해야 하는 검사 시기 포함)
- ☐ 실제 감염을 일으킬 수 있는 조건(감염 전파력이 있는 기간, 경로 포함)

2-24-1. 위의 문항에 포함되지 않은 항목 중 반드시 필요하다고 생각하시는 것이 있다면 자유롭게 기술하여 주십시오.

( )
